# Supplementary material for: Screening for Hypertension in the INpatient Environment(SHINE): a protocol for a prospective study of diagnostic accuracy among adult hospital patients
Source: PubMed Central journal article supplement — BMJ Open. 2019 Dec 4;9(12):e033792. doi: 10.1136/bmjopen-2019-033792 (PMC6924759; doi:10.1136/bmjopen-2019-033792), 2019-12-04

# BMJ Open

BMJ Open is committed to open peer review. As part of this commitment we make the peer review history of every article we publish publicly available.

When an article is published we post the peer reviewers' comments and the authors' responses online. We also post the versions of the paper that were used during peer review. These are the versions that the peer review comments apply to.

The versions of the paper that follow are the versions that were submitted during the peer review process. They are not the versions of record or the final published versions. They should not be cited or distributed as the published version of this manuscript.

BMJ Open is an open access journal and the full, final, typeset and author-corrected version of record of the manuscript is available on our site with no access controls, subscription charges or pay-per-view fees (<http://bmjopen.bmj.com>).

If you have any questions on BMJ Open's open peer review process please email [info.bmjopen@bmj.com](mailto:info.bmjopen@bmj.com)

# BMJ Open

## Screening for Hypertension in the INpatient Environment (SHINE): A protocol for a Prospective Study of Diagnostic Accuracy among adult hospital patients

|                               |                                                                                                                                                                                                                                                                                                                                                                                                                                                                                                                                                                                                                                                                                                             |
|-------------------------------|-------------------------------------------------------------------------------------------------------------------------------------------------------------------------------------------------------------------------------------------------------------------------------------------------------------------------------------------------------------------------------------------------------------------------------------------------------------------------------------------------------------------------------------------------------------------------------------------------------------------------------------------------------------------------------------------------------------|
| Journal:                      | <i>BMJ Open</i>                                                                                                                                                                                                                                                                                                                                                                                                                                                                                                                                                                                                                                                                                             |
| Manuscript ID                 | bmjopen-2019-033792                                                                                                                                                                                                                                                                                                                                                                                                                                                                                                                                                                                                                                                                                         |
| Article Type:                 | Protocol                                                                                                                                                                                                                                                                                                                                                                                                                                                                                                                                                                                                                                                                                                    |
| Date Submitted by the Author: | 22-Aug-2019                                                                                                                                                                                                                                                                                                                                                                                                                                                                                                                                                                                                                                                                                                 |
| Complete List of Authors:     | Armitage, Laura; University of Oxford, Nuffield Department of Primary Care Health Sciences<br>Mahdi, Adam; University of Oxford, Institute of Biomedical Engineering, Department of Engineering Science<br>Lawson, Beth; University of Oxford, Nuffield Department of Primary Care Health Sciences<br>Fanshawe, Thomas; University of Oxford, Nuffield Department of Primary Care Health Sciences<br>Tarassenko, Lionel; University of Oxford, Institute of Biomedical Engineering, Department of Engineering Science<br>Farmer, Andrew; University of Oxford, Nuffield Department of Primary Care Health Sciences<br>Watkinson, Peter; University of Oxford, Nuffield Department of Clinical Neurosciences |
| Keywords:                     | Hypertension < CARDIOLOGY, PUBLIC HEALTH, GENERAL MEDICINE (see Internal Medicine)                                                                                                                                                                                                                                                                                                                                                                                                                                                                                                                                                                                                                          |
|                               |                                                                                                                                                                                                                                                                                                                                                                                                                                                                                                                                                                                                                                                                                                             |

SCHOLARONE™  
Manuscripts

**Title of Article:**

Screening for Hypertension in the INpatient Environment (SHINE): A protocol for a  
Prospective Study of Diagnostic Accuracy among adult hospital patients

**Corresponding author:**

Laura Armitage  
Nuffield Department of Primary Care Health Sciences,  
Radcliffe Primary Care Building  
Radcliffe Observatory Quarter,  
Woodstock Road,  
Oxford  
Ox2 6GG  
Email: [laura.armitage@phc.ox.ac.uk](mailto:laura.armitage@phc.ox.ac.uk)  
Tel: 01865 289259

**Co-authors:**

Adam Mahdi<sup>a</sup>  
Beth K Lawson<sup>b</sup>  
Thomas R Fanshawe<sup>b</sup>  
Lionel Tarassenko<sup>a</sup>  
Andrew J Farmer<sup>b</sup>  
Peter J Watkinson<sup>c</sup>

<sup>a</sup>Institute of Biomedical Engineering, Department of Engineering Science, University of Oxford, Oxford, UK

<sup>b</sup>Nuffield Department of Primary Care Health Sciences, University of Oxford, Oxford, UK

<sup>c</sup>Nuffield Department of Clinical Neurosciences, University of Oxford, Oxford, UK

**Word Count (excluding title page, abstract, references, figures and tables): 2626**

## ABSTRACT

### Introduction

A significant percentage of patients admitted to hospital have undiagnosed hypertension. However, present hypertension guidelines in the UK, Europe and USA do not define a blood pressure threshold at which hospital inpatients should be considered at risk of hypertension, outside of the emergency setting. The objective of this study is to identify the optimal in-hospital mean blood pressure threshold, above which patients should receive post-discharge blood pressure assessment in the community.

### Methods and Analysis

SHINE is a prospective diagnostic accuracy study. Patients admitted to hospital whose average blood pressure after 24 hours meets the study eligibility threshold ( $\geq 120/70$ mmHg) and who have no prior diagnosis of, or medication for hypertension will be eligible. At 8 weeks post-discharge, recruited participants will wear an ambulatory blood pressure monitor for 24 hours. Mean daytime ambulatory blood pressure will be calculated to assess for the presence or absence of hypertension. Diagnostic performance of in-hospital blood pressure will be assessed by constructing Receiver Operator Characteristic (ROC) curves from participants' in-hospital mean systolic and mean diastolic blood pressure (index test) versus diagnosis of hypertension determined by mean daytime ambulatory blood pressure (reference test).

### Ethics and Dissemination

Ethical approval has been provided by the NHS Health Research Authority South Central – Oxford B Research Ethics Committee (19/SC/0026). Findings will be disseminated through national and international conferences, peer-reviewed journals and social media.

### STRENGTHS AND LIMITATIONS OF THIS STUDY

- This is the first study to our knowledge to evaluate the diagnostic accuracy of a range of in-hospital blood pressure thresholds to identify the optimal blood pressure cut-off values for in-hospital hypertension screening.
- This is also the first study to our knowledge, to use real-time electronic algorithms to screen hospital inpatients' electronic blood pressure data.

- 1  
2  
3 • Owing to the novel design of this study, the expected prevalence of hypertension at follow up is  
4 unknown and has therefore been estimated to calculate the sample size.  
5  
6  
7  
8  
9

### 10 **Patient and Public Involvement**

11 The design of this study has been reviewed and supported by patient and public representatives  
12 who have provided input on the research questions, data analysis, informational material for public  
13 engagement and the burden of the follow up diagnostic testing from a patient's perspective. Their  
14 input lead to additional steps in data analysis, refining of the informational material and  
15 modification of the follow up plan to reduce patient burden.  
16  
17  
18  
19  
20  
21  
22  
23  
24  
25  
26  
27  
28  
29  
30  
31  
32  
33  
34  
35  
36  
37  
38  
39  
40  
41  
42  
43  
44  
45  
46  
47  
48  
49  
50  
51  
52  
53  
54  
55  
56  
57  
58  
59  
60

## INTRODUCTION

Hypertension is the leading risk factor for death globally[1] with 12.8% of annual mortality attributable to hypertension.[2] A significant percentage of patients admitted to hospital have undiagnosed hypertension.[3,4] However, unless a person has severely elevated blood pressure, the clinical diagnosis of hypertension cannot be made in the in-hospital setting based on the UK, European or American Guidelines.[5–7] Indeed, increased blood pressure measurements in hospital are frequently dismissed and additional potential reasons for this include clinicians attributing increased blood pressure measurements to anxiety,[8] pain[9] or white coat hypertension.[10] However, evidence suggests that patients with elevated blood pressure recordings in hospital frequently remain hypertensive in the community.[11–17] Despite this, referral for community follow-up of these patients to determine the presence or absence of persistent hypertension is poor.[18–21]

Untreated hypertension is associated with a progressive increase in blood pressure that can become treatment resistant.[22] Therefore, hospital detection and timely management of hypertension offer an important intervention opportunity to address this major cause of morbidity and mortality.

In 2015, Oxford University Hospitals NHS Foundation Trust (OUHFT) introduced the NIHR-funded System for Electronic Notification and Documentation (SEND).[23] SEND is a tailored software application which links hospital bedside monitoring devices including blood pressure monitors, with a tablet computer for the manual recording of vital observations of patients.[24] Since this implementation, clinicians and researchers have been able to access and analyse patient observation data at a population as well as individual level. SEND has been used to record the vital observations of more than 200,000 patients so far and to link each patient's observations with their Electronic Patient Record (EPR).[24] This has paved the way for real-time and automated recognition of patients whose observations indicate they may be at increased risk of undiagnosed hypertension.

The objective of this study is to identify the optimal in-hospital mean blood pressure threshold, above which patients should receive post-discharge blood pressure assessment in the community.

## METHODS AND ANALYSIS

We prepared this protocol following the STARD[25] guidelines.

### Study Design

This is a UK single-centre, prospective cohort diagnostic accuracy study. The study is due to commence in June 2019 and active follow-up will continue until May 2021.

### Study Setting

Recruitment for this study will take place in Oxford University Hospitals NHS Foundation Trust (OUHFT), UK. Participants will be followed up in a community research clinic at 8 weeks (+/-4) following discharge from hospital to receive reference blood pressure testing. Participant timeline is shown in Figure 1.

### Study Population

We will recruit participants aged between 18 and 80 years, whose mean blood pressure is between 120mmHg and 179mmHg systolic and  $\leq 109$ mmHg diastolic for any given 24-hour interval since their admission to hospital (index test). The mean blood pressure calculation must be based on a minimum of three blood pressure measurements taken over a minimum period of 24 hours with at least one blood pressure being recorded during night time hours (00:00 to 06:00) and at least one being recorded during day time hours (10:00 and 20:00).[26] Patients with an ICD10 code for hypertension or blood pressure lowering medication prescribed in their medication record will be excluded. Additional exclusion criteria include current, intended or recent pregnancy, cause for index admission being associated with end-organ damage related to severe hypertension (including but not limited to heart failure, myocardial infarction, stroke, hypertensive encephalopathy) and estimated glomerular infiltration rate of  $<30$  ml/min. Full inclusion and exclusion criteria are provided in Table 1.

| Inclusion Criteria                                                                                                                        | Exclusion criteria                                                                                                                    |
|-------------------------------------------------------------------------------------------------------------------------------------------|---------------------------------------------------------------------------------------------------------------------------------------|
| Aged 18-80                                                                                                                                | Pre-existing diagnosis of hypertension or attending hospital with acute end-organ damage related to severe, undiagnosed hypertension. |
| Admitted to hospital for an acute or elective medical or surgical condition                                                               | Presence of atrial fibrillation or other pulse rate irregularity which means ABPM is not appropriate.                                 |
| Have at least three in-hospital blood pressure recordings over a minimum of 24 hours for the index admission.                             | Currently pregnant, within 3 months post-partum or planning pregnancy during study period.                                            |
| Identified by the blood pressure algorithm for any 24-hour interval to have a mean blood pressure which meets the eligibility thresholds. | Receiving treatments which might be used for the management of hypertension, e.g. beta blockers                                       |

|    |                                         |                                                     |
|----|-----------------------------------------|-----------------------------------------------------|
| 1  |                                         | for migraine, angiotensin-converting-enzyme         |
| 2  |                                         | inhibitors for renal disease.                       |
| 3  |                                         |                                                     |
| 4  |                                         |                                                     |
| 5  |                                         |                                                     |
| 6  | Registered with a General Practitioner. | Diagnosed with terminal illness or cognitive        |
| 7  |                                         | impairment.                                         |
| 8  |                                         |                                                     |
| 9  |                                         | Diagnosed with AKI on index admission or eGFR       |
| 10 |                                         | <30ml/min.                                          |
| 11 |                                         |                                                     |
| 12 |                                         | Cause for hypertension being toxicology, medical    |
| 13 |                                         | or recreational e.g amphetamines and their          |
| 14 |                                         | derivatives or alcohol withdrawal syndrome.         |
| 15 |                                         |                                                     |
| 16 |                                         | Post-discharge destination being another hospital   |
| 17 |                                         | or prison.                                          |
| 18 |                                         |                                                     |
| 19 |                                         | Receiving concomitant chemotherapy.                 |
| 20 |                                         |                                                     |
| 21 |                                         | Already recruited to a separate hypertension study. |
| 22 |                                         |                                                     |

Table 1. Full inclusion and exclusion criteria

ABPM = ambulatory blood pressure monitoring, AKI = acute kidney injury,

### Screening procedure

The identification of participants whose blood pressure exceeds the index test threshold will be automated using live, computerised algorithms. Blood pressure measurements in OUHFT are made using automated oscillometric devices and the BP monitor reading is entered manually using the SEND computer tablet before automated transfer to the electronic patient record by the SEND software app.[23] The identification of patients whose blood pressure measurements meet eligibility criteria will be computerised and automated. These automated systems for blood pressure documentation and evaluating study inclusion criteria are intended to ensure that the measurement of the index test is objective and thus the clinical staff who perform the blood pressure measurements can be considered blinded in the assessment of the index test. As this study is prospective in design they will not be aware of the result of the reference standard.

### Participant sampling

Sampling will be stratified to ensure that there is representation of patients with a full range of in-hospital blood pressure profiles (according to pre-defined mean daytime systolic blood pressure, Table 2). Where there is insufficient study resource to enrol all recruitable patients, priority will be given to the strata with the least recruited patients. Recruitment will continue until the target recruitment number within each of the blood pressure intervals is achieved. The prevalence of each



blood pressure profile among the hospital population will be recorded within a screening log during the study period.

| Systolic blood pressure Interval | Target recruitment number |
|----------------------------------|---------------------------|
| 120-129                          | Approximately equal       |
| 130-139                          | representation of         |
| 140-149                          | participants recruited to |
| 150-159                          | each of these systolic    |
| 160-179                          | bandwidth profiles        |
| <b>TOTAL</b>                     | <b>200</b>                |

Table 2. Systolic blood pressure intervals against which recruitment will be stratified

### Data Collection

Baseline data collection will be performed at the point of recruitment during the hospital admission, after the participant has provided informed, written consent. Custom-made baseline case report forms (CRFs) will be completed in the study data capture system for each participant by an appropriately qualified clinical researcher. The study data capture system will be electronic and accessible online, using a combination of data extracted from the EPR (e.g. diagnostic codes, current medications, serum haematology and biochemistry results and electrocardiogram) and participant self-report (e.g. ethnicity family history, previous prescribed medications for hypertension). Any extreme values entered into the electronic data capture system will be inspected. A data monitoring committee has not been convened since there is no concealed allocation to treatment in this cohort study. Frequency and procedures for auditing study conduct are determined by the study sponsor (University of Oxford) based on a proportionate approach to risks.

## TEST METHODS

### Index Diagnostic Test

The index test will be the first occurrence during the hospital stay of a cumulative mean 24-hour in-hospital blood pressure reading  $\geq 130$ mmHg systolic or  $\geq 80$ mmHg diastolic. By averaging a person's blood pressure measurements from the point of admission to the time of assessment by the algorithm, the chances of a person becoming eligible due to chance are reduced, in comparison to alternative, of assessing a person's eligibility based on 24 hour intervals of blood pressure

1  
2  
3 measurements. The index test has been defined to reflect international consensus on the definition  
4 of stage 1 hypertension.[6,7]  
5  
6  
7

### 8 **Reference Standard Diagnostic Test**

9  
10 The gold standard diagnostic test for the presence of hypertension will be a daytime 24-hour  
11 ambulatory blood pressure threshold of  $\geq 135$ mmHg systolic or  $\geq 85$ mmHg diastolic, which is the  
12 current UK National Institute for Health and Care Excellence (NICE) diagnostic threshold for  
13 Ambulatory Blood Pressure Monitoring (ABPM).[5]  
14  
15  
16

17  
18 ABPM will be performed with each participant at 8 weeks (+/-4) following discharge from hospital  
19 using a validated automated Mobil-O-Graph ambulatory blood pressure monitor (IEM GmbH,  
20 Stolberg, Germany), calibrated to manufacturer standards. Should the participant have acquired a  
21 diagnosis of hypertension and initiated treatment for hypertension following hospital discharge but  
22 before they receive ABPM, they will not be eligible to proceed with ABPM. In this instance a participant  
23 will be regarded as being reference test positive, having acquired a clinical diagnosis of hypertension.  
24 The monitor will be programmed to measure blood pressure twice per hour during daytime hours  
25 (07:00 to 22:00), and once per hour during the night (22:00 to 07:00) for a period of 24 hours.[27] A  
26 minimum of 70% of the day time and 70% of the night time ABPM recordings must be successful in  
27 order to calculate the mean blood pressure for night and day and for the participant data to be  
28 analysed.[26] Where less than 70% of the recordings in any category are successful, the participant  
29 will be asked to wear the monitor for a further 24-hour period in order to collect adequate data. In  
30 the instance of two 24-hour episodes of ABPM not collecting sufficient data, the participant and their  
31 registered General Practitioner (GP) will be informed along with recommendation that the participant  
32 arrange an appointment with their GP for further evaluation of their blood pressure. The participant  
33 will continue to be followed up remotely through the online data capture system for up to 52 weeks  
34 from recruitment (Figure 1). Links to the questionnaires will be sent to participants by email and will  
35 collect data regarding blood pressure related health outcomes, the prescription of antihypertensive  
36 medications and repeat blood pressure measurements. At ten years, data will be obtained from the  
37 Office of National Statistics and Hospital Episode Statistics Databases regarding mortality and  
38 cardiovascular health related outcomes.  
39  
40  
41  
42  
43  
44  
45  
46  
47  
48  
49  
50  
51  
52  
53

54  
55 The fitting and removal of the ambulatory blood pressure monitor will be performed by a qualified  
56 clinical research nurse who is appropriately trained in the National Institute for Health's Good Clinical  
57 Practice and to perform ABPM. At the time of removal of the monitor, the electronic ABPM report will  
58  
59  
60

1  
2  
3 be downloaded to the study data capture system and interpreted by the research nurse. As the  
4 reference test procedure is objective through the use of an oscillometric, automated ABPM, the  
5 research nurse will not be blinded to the result of the index blood pressure test.  
6  
7  
8  
9

## 10 **STATISTICAL METHODS**

### 11 **Sample size**

12  
13 Owing to the novel design of this study, estimates of expected prevalence of hypertension at follow-  
14 up have been used to calculate sample size. From a retrospective analysis of in-hospital OUHFT blood  
15 pressure data we estimate that 3000 patients per annum will be eligible for study inclusion  
16 (unpublished data). Previous studies have used an in-hospital blood pressure eligibility threshold  
17 (140/90mmHg) and revealed approximately that half of the patients with a blood pressure above the  
18 threshold have hypertension at follow up.[28,29] A lower rate of hypertension at follow-up is expected  
19 in this study owing to the lower eligibility blood pressure threshold of 120/70mmHg; a sample size of  
20 200 has been derived to permit detection of a 20% rate of hypertension at follow-up with a 95%  
21 confidence interval width of approximately of  $\pm 5.36\%$ .  
22  
23  
24  
25  
26  
27  
28  
29

### 30 **Baseline characteristics**

31  
32 Clinical and demographic characteristics of the study population will be reported, including age, sex,  
33 presenting complaint, comorbidity and current treatments. Number of participants who complete  
34 each stage of the protocol will be reported, including those who complete successful ABPM, with  
35 reasons for failed testing where appropriate. Recruitment and study completion figures will be  
36 reported using a participant flow diagram. Interpretation of the ABPM result will be performed by  
37 researchers who are blind to the participant's index blood pressure test.  
38  
39  
40  
41  
42  
43

### 44 **Index Test Performance**

45  
46 Diagnostic performance of in-hospital blood pressure will be assessed by constructing Receiver  
47 Operator Characteristic (ROC) curves from participants' in-hospital mean systolic and mean diastolic  
48 blood pressure (index test) versus diagnosis of hypertension determined by mean daytime ABPM  
49 (reference test). At first instance a complete case analysis will be performed by excluding patients  
50 without an observed test result. At the second instance, for patients with missing ABPM values, the  
51 data will be imputed. The two approaches will be compared and the number of cases with missing  
52 values will be reported, together with detailed description of the strategy for handling the missing  
53 data. The Area Under the Receiver Operator Curve (AUROC) will be calculated to estimate the  
54 discriminatory power of the diagnostic test.[30] Potential diagnostic blood pressure thresholds will  
55  
56  
57  
58  
59  
60

then be identified from the ROC curve.[30,31] The diagnostic ability of each potential cut-off threshold will be evaluated using two-by-two tables[31] to compare sensitivity and specificity of each potential threshold. Confidence intervals will be reported for each value. Reproducibility of the index test and variability in diagnostic accuracy will be analysed using subsequent available periods of the hospital admission in which participants' mean in-hospital blood pressure values were at or above the recruitment threshold.

### Subgroup Analyses

Logistic regression analyses will be performed to estimate whether the diagnostic performance of in-hospital mean blood pressure is influenced by participant baseline characteristics, including age, sex, body mass index and comorbidity. Further subgroup analyses will include whether the index admission was scheduled or unscheduled and whether the admitting specialty was medical or surgical.

### Additional analyses

Once the optimal thresholds for the in-hospital screening for hypertension have been identified, diagnostic accuracy of the thresholds at successive 24-hour intervals of patient admission will be estimated. Whilst the reference test for this study is based on the current UK diagnostic criteria for the diagnosis of hypertension, additional analyses will be performed using the European and American diagnostic thresholds for hypertension as shown in table 3.[6,7]

| ABPM diagnostic thresholds for hypertension | European Society of Cardiology/European Society of Hypertension |           | American College of Cardiology |           |
|---------------------------------------------|-----------------------------------------------------------------|-----------|--------------------------------|-----------|
|                                             | Systolic                                                        | Diastolic | Systolic                       | Diastolic |
| 24-hour                                     | 130                                                             | 80        | 125                            | 75        |
| Night                                       | 120                                                             | 70        | 110                            | 65        |
| Day                                         | 135                                                             | 85        | 130                            | 80        |

Table 3, European Society of Cardiology/European Society of Hypertension[6] and American College of Cardiology[7] diagnostic thresholds for hypertension.

## ETHICS AND DISSEMINATION

### Ethics

This study (Protocol Version 1.7) has been given ethical approval from the NHS Health Research Authority South Central – Oxford B Research Ethics Committee (19/SC/0026). Any planned protocol modifications will receive further sponsor and ethical review and require approval prior to implementation. Any approved modifications will be communicated in the ISRCTN Registry where the

1  
2  
3 study is registered. All participants will be required to give informed, written consent and will be  
4 advised that they can withdraw from the study at any time and without giving reason. Consent will be  
5 obtained by a trained clinical researcher.  
6  
7  
8  
9

10 We do not anticipate any harms from the use of ABPM, which is already a standard procedure for the  
11 diagnosis of hypertension in UK primary care and therefore this study does not carry any significant  
12 risk to participants. The measurement of ambulatory blood pressure among the participants of this  
13 study is in addition to usual care and may be considered beneficial if we detect the presence of  
14 undiagnosed hypertension earlier than may have otherwise been the case. If at any point a participant  
15 is found to have severely raised blood pressure, their responsible hospital care team or General  
16 Practitioner will be informed, following study Standard Operating Procedures, according to whether  
17 severely elevated blood pressure was observed in the hospital or community, respectively. Any  
18 adverse events which arise as a result of performing ABPM will be reported. The participant and their  
19 General Practitioner will both be informed of the ABPM result and any decision to initiate treatment  
20 will be made between the patient and their General Practitioner in line with standard care.  
21  
22  
23  
24  
25  
26  
27  
28  
29

30 Data will be analysed by researchers based in the University of Oxford (Nuffield Department of Clinical  
31 Neurosciences, Nuffield Department of Primary Care Health Sciences and Institute of Biomedical  
32 Engineering).  
33  
34  
35  
36

### 37 **Dissemination**

38 Findings from this study will be disseminated through peer-reviewed journals, conferences, public  
39 engagement activities and online. Participants will be able to access results online.  
40  
41  
42  
43

### 44 **Discussion**

45 The SHINE study will be the first study to our knowledge, to evaluate the diagnostic accuracy of in-  
46 hospital blood pressure measurements on a continuous scale and therefore identify the optimal blood  
47 pressure cut-off values for in-hospital hypertension screening. In addition this will be the first study to  
48 our knowledge, which uses real-time electronic algorithms to screen hospital inpatients' electronic  
49 blood pressure data. The automated detection and subsequent treatment of previously undiagnosed  
50 hypertension has the potential to prevent the development of serious hypertension-related diseases.  
51  
52  
53  
54  
55  
56

57 The study is limited by uncertainty in the expected prevalence of hypertension at follow up, which has  
58 been used to estimate the required sample size.  
59  
60

### Funding and Sponsor

This study is funded by the National Institute for Health (NIHR) Oxford Biomedical Research Centre (BRC) Technology and Digital Health theme. The views expressed are those of the authors and not necessarily those of the NIHR or the Department of Health and Social Care. AF is an NIHR Senior Investigator. The sponsor is the University of Oxford. The sponsor has provided ethical and legal guidance in study conduction. Neither the funder nor sponsor have had or will have, any role in study design, collection, management, analysis, interpretation of data or writing of the report.

**Author Contributions:** PJW is the principal investigator. LCA, PJW, AJF, AM and LT made substantial contributions to the conception and design of the project. BL has contributed significantly to protocol development. TF provided advice on statistical methodology. All authors contributed to and revised the final manuscript.

### Competing Interests

None declared.

### REFERENCES

- 1 Campbell NRC, Lackland DT, Niebylski ML. High Blood Pressure: Why Prevention and Control Are Urgent and Important-A 2014 Fact Sheet From the World Hypertension League and the International Society of Hypertension. *J Clin Hypertens* 2014;**16**:551–3. doi:10.1111/jch.12372
- 2 World Health Organisation. Global Health Observatory (GHO) data: Raised blood pressure. *WHO* Published Online First: 2015.[http://www.who.int/gho/ncd/risk\\_factors/blood\\_pressure\\_prevalence\\_text/en/](http://www.who.int/gho/ncd/risk_factors/blood_pressure_prevalence_text/en/) (accessed 27 Feb 2018).
- 3 Shankar BS, Russell RP, Southard JW, *et al.* Patterns of Care for Hypertension Among Hospitalized Patients. *Public Health Rep* 1982;**97**:521–7.<https://www.ncbi.nlm.nih.gov/pmc/articles/PMC1424386/pdf/pubhealthrep00114-0023.pdf> (accessed 27 Feb 2018).
- 4 Greenland P, Levenkron JC, Smith RM. Hospitalization as an Opportunity to Improve Hypertension Recognition and Control. *Source Med Care* 1987;**25**:717–23.<http://www.jstor.org/stable/3765708> (accessed 27 Feb 2018).
- 5 National Institute for Health and Care Excellence. Clinical Guideline CG127. Hypertension in adults: diagnosis and management. 2011.<https://www.nice.org.uk/guidance/cg127> (accessed

- 1  
2  
3 2 Aug 2018).
- 4  
5 6 Williams B, Mancia G, Spiering W, *et al.* 2018 ESC/ESH Guidelines for the management of  
6 arterial hypertension. *J Hypertens* 2018;**36**:1953–2041. doi:10.1097/HJH.0000000000001940
- 7  
8 7 Whelton PK, Carey RM, Aronow WS, *et al.* 2017  
9 ACC/AHA/AAPA/ABC/ACPM/AGS/APhA/ASH/ASPC/NMA/PCNA Guideline for the Prevention,  
10 Detection, Evaluation, and Management of High Blood Pressure in Adults. *J Am Coll Cardiol*  
11 2018;**71**:e127–248. doi:10.1016/j.jacc.2017.11.006
- 12  
13  
14  
15 8 Backer HD, Decker L, Ackerson L. Reproducibility of increased blood pressure during an  
16 emergency department or urgent care visit. *Ann Emerg Med* 2003;**41**:507–12.  
17 doi:10.1067/MEM.2003.151
- 18  
19  
20 9 Tanabe P, Cline DM, Cienki JJ, *et al.* Barriers to screening and intervention for ED patients at  
21 risk for undiagnosed or uncontrolled hypertension. *J Emerg Nurs* 2011;**37**:17–23.  
22 doi:10.1016/j.jen.2009.11.017
- 23  
24  
25 10 Khan T V, Khan SS-S, Akhondi A, *et al.* White coat hypertension: relevance to clinical and  
26 emergency medical services personnel. *Medscape Gen Med*  
27 2007;**9**:52. <http://www.ncbi.nlm.nih.gov/pubmed/17435652> (accessed 22 Aug 2018).
- 28  
29  
30 11 EUROASPIRE Study Group. EUROASPIRE. A European Society of Cardiology survey of  
31 secondary prevention of coronary heart disease: principal results. E. *Eur Heart J*  
32 1997;**18**:1569–82. <http://www.ncbi.nlm.nih.gov/pubmed/9347267> (accessed 27 Feb 2018).
- 33  
34  
35 12 EUROASPIRE II Study Group. Lifestyle and risk factor management and use of drug therapies  
36 in coronary patients from 15 countries: Principal results from EUROASPIRE II Euro Heart  
37 Survey Programme. *Eur Heart J* 2001;**22**:554–72. <http://www.idealibrary.com> (accessed 27  
38 Feb 2018).
- 39  
40  
41  
42 13 Jankowski P, Kawecka-Jaszcz K, Bilo G, *et al.* Determinants of poor hypertension management  
43 in patients with ischaemic heart disease. *Blood Press* 2005;**14**:284–92.  
44 doi:10.1080/08037050500239962
- 45  
46  
47 14 Conen D, Martina B, Perruchoud AP, *et al.* High prevalence of newly detected hypertension in  
48 hospitalized patients: the value of in-hospital 24-h blood pressure measurement. *J Hypertens*  
49 2006;**24**:301–6. <https://insights.ovid.com/pubmed?pmid=16508576> (accessed 26 Feb 2018).
- 50  
51  
52 15 Kotseva K, Wood D, Backer G De, *et al.* EUROASPIRE III: a survey on the lifestyle, risk factors  
53 and use of cardioprotective drug therapies in coronary patients from 22 European countries.  
54 *Eur J Cardiovasc Prev Rehabil* 2009;**16**:121–37. doi:10.1097/HJR.0b013e3283294b1d
- 55  
56  
57 16 Kotseva K, Wood D, De Bacquer D, *et al.* EUROASPIRE IV: A European Society of Cardiology  
58 survey on the lifestyle, risk factor and therapeutic management of coronary patients from 24  
59  
60



- 1  
2  
3 European countries. *Eur J Prev Cardiol* 2016;**23**:636–48. doi:10.1177/2047487315569401
- 4  
5 17 Armitage LC, Whelan ME, Watkinson PJ, *et al*. Screening for hypertension using emergency  
6 department blood pressure measurements can identify patients with undiagnosed  
7 hypertension: A systematic review with meta-analysis. *J Clin Hypertens (Greenwich)*  
8 2019;:jch.13643. doi:10.1111/jch.13643
- 9  
10  
11 18 Tilman K, DeLashaw M, Lowe S, *et al*. Recognizing asymptomatic elevated blood pressure in  
12 ED patients: how good (bad) are we? *Am J Emerg Med* 2007;**25**:313–7.  
13 doi:10.1016/J.AJEM.2006.09.007
- 14  
15  
16 19 Baumann BM, Cienki JJ, Cline DM, *et al*. Evaluation, management, and referral of elderly  
17 emergency department patients with elevated blood pressure. *Blood Press Monit*  
18 2009;**14**:251–6. doi:10.1097/MBP.0b013e328332fd40
- 19  
20  
21 20 Lehrmann JF, Tanabe P, Baumann BM, *et al*. Knowledge Translation of the American College  
22 of Emergency Physicians Clinical Policy on Hypertension. *Acad Emerg Med* 2007;**14**:1090–6.  
23 doi:10.1111/j.1553-2712.2007.tb02394.x
- 24  
25  
26 21 Baumann BM, Cline DM, Cienki JJ, *et al*. Provider Self-Report and Practice: Reassessment and  
27 Referral of Emergency Department Patients With Elevated Blood Pressure. *Am J Hypertens*  
28 2009;**22**:604–10. doi:10.1038/ajh.2009.44
- 29  
30  
31 22 National Institute for Health and Clinical Excellence. Guideline scope: Hypertension in adults  
32 (update). 2017. <https://www.nice.org.uk/guidance/GID-NG10054/documents/draft-scope>  
33 (accessed 27 Feb 2018).
- 34  
35  
36 23 Wong D, Bonnici T, Knight J, *et al*. SEND: a system for electronic notification and  
37 documentation of vital sign observations. *BMC Med Inform Decis Mak* 2015;**15**:68.  
38 doi:10.1186/s12911-015-0186-y
- 39  
40  
41 24 Wong D. SEND: System for Electronic Notification and Documentation. [http://www.send-](http://www.send-system.co.uk/about.html)  
42 [system.co.uk/about.html](http://www.send-system.co.uk/about.html) (accessed 2 Aug 2018).
- 43  
44  
45 25 Cohen JF, Korevaar DA, Altman DG, *et al*. STARD 2015 guidelines for reporting diagnostic  
46 accuracy studies: explanation and elaboration. *BMJ Open* 2016;**6**:e012799.  
47 doi:10.1136/bmjopen-2016-012799
- 48  
49  
50 26 Mancia G, Fagard R, Narkiewicz K, *et al*. 2013 ESH/ESC guidelines for the management of  
51 arterial hypertension: The Task Force for the management of arterial hypertension of the  
52 European Society of Hypertension (ESH) and of the European Society of Cardiology (ESC). *Eur*  
53 *Heart J* 2013;**34**:2159–219. doi:10.1093/eurheartj/eht151
- 54  
55  
56 27 British and Irish Hypertension Society. Standard Operating Procedure for Ambulatory Blood  
57 Pressure Monitoring (ABPM). 2011. <https://bihsoc.org/resources/bp-measurement/abpm/>  
58  
59  
60



- 1  
2  
3 (accessed 11 Aug 2018).  
4  
5 28 Tsoi LCH, Tung CCH, Wong ELY. Nurse-led hypertension referral system in an emergency  
6 department for asymptomatic elevated blood pressure. *Hong Kong Med J* 2012;**18**:201–  
7 6.<http://www.ncbi.nlm.nih.gov/pubmed/22665683> (accessed 2 Aug 2018).  
8  
9  
10 29 Arhami Dolatabadi A, Motamedi M, Hatamabadi H, *et al.* Prevalence of undiagnosed  
11 hypertension in the emergency department. *Trauma Mon* 2014;**19**:e7328.  
12 doi:10.5812/traumamon.7328  
13  
14  
15 30 Greiner M, Pfeiffer D, Smith RD. Principles and practical application of the receiver-operating  
16 characteristic analysis for diagnostic tests. *Prev Vet Med* 2000;**45**:23–  
17 41.<http://www.ncbi.nlm.nih.gov/pubmed/10802332> (accessed 21 Nov 2018).  
18  
19  
20 31 Hajian-Tilaki K. Receiver Operating Characteristic (ROC) Curve Analysis for Medical Diagnostic  
21 Test Evaluation. *Casp J Intern Med* 2013;**4**:627–  
22 35.<http://www.ncbi.nlm.nih.gov/pubmed/24009950> (accessed 21 Nov 2018).  
23  
24  
25  
26  
27  
28  
29

### Figure Legends

30 *Figure 1. Participant Timeline*  
31  
32  
33  
34  
35  
36  
37  
38  
39  
40  
41  
42  
43  
44  
45  
46  
47  
48  
49  
50  
51  
52  
53  
54  
55  
56  
57  
58  
59  
60

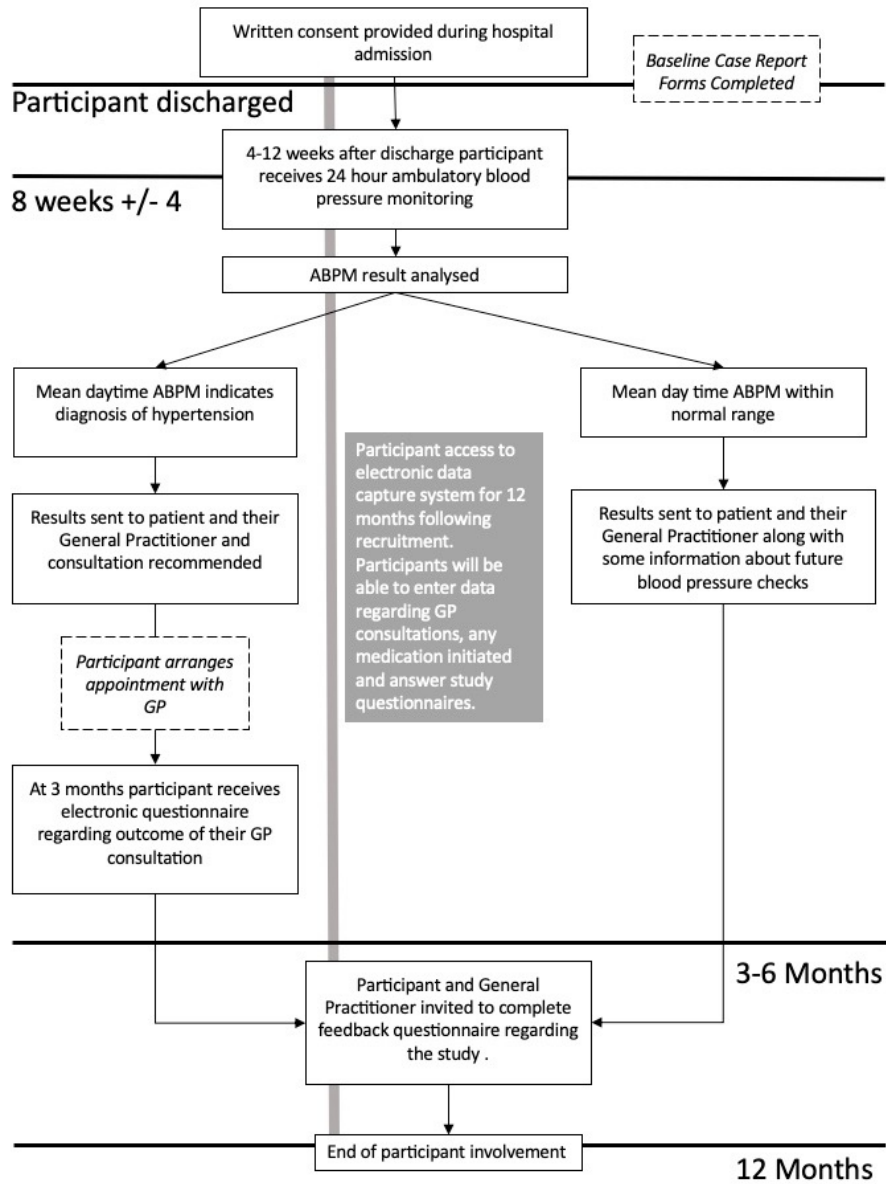

Figure 1. Participant Timeline

240x319mm (72 x 72 DPI)

| Section & Topic          | No         | Item                                                                                                                                                   | Reported on page #                                                                                   |
|--------------------------|------------|--------------------------------------------------------------------------------------------------------------------------------------------------------|------------------------------------------------------------------------------------------------------|
| <b>TITLE OR ABSTRACT</b> |            |                                                                                                                                                        |                                                                                                      |
|                          | <b>1</b>   | Identification as a study of diagnostic accuracy using at least one measure of accuracy (such as sensitivity, specificity, predictive values, or AUC)  | 1                                                                                                    |
| <b>ABSTRACT</b>          |            |                                                                                                                                                        |                                                                                                      |
|                          | <b>2</b>   | Structured summary of study design, methods, results, and conclusions (for specific guidance, see STARD for Abstracts)                                 | 2                                                                                                    |
| <b>INTRODUCTION</b>      |            |                                                                                                                                                        |                                                                                                      |
|                          | <b>3</b>   | Scientific and clinical background, including the intended use and clinical role of the index test                                                     | 4                                                                                                    |
|                          | <b>4</b>   | Study objectives and hypotheses                                                                                                                        | 4                                                                                                    |
| <b>METHODS</b>           |            |                                                                                                                                                        |                                                                                                      |
| <i>Study design</i>      | <b>5</b>   | Whether data collection was planned before the index test and reference standard were performed (prospective study) or after (retrospective study)     | 5                                                                                                    |
| <i>Participants</i>      | <b>6</b>   | Eligibility criteria                                                                                                                                   | 5-6                                                                                                  |
|                          | <b>7</b>   | On what basis potentially eligible participants were identified (such as symptoms, results from previous tests, inclusion in registry)                 | 6                                                                                                    |
|                          | <b>8</b>   | Where and when potentially eligible participants were identified (setting, location and dates)                                                         | 5                                                                                                    |
|                          | <b>9</b>   | Whether participants formed a consecutive, random or convenience series                                                                                | 6                                                                                                    |
| <i>Test methods</i>      | <b>10a</b> | Index test, in sufficient detail to allow replication                                                                                                  | 7                                                                                                    |
|                          | <b>10b</b> | Reference standard, in sufficient detail to allow replication                                                                                          | 7-8                                                                                                  |
|                          | <b>11</b>  | Rationale for choosing the reference standard (if alternatives exist)                                                                                  | 8                                                                                                    |
|                          | <b>12a</b> | Definition of and rationale for test positivity cut-offs or result categories of the index test, distinguishing pre-specified from exploratory         | 7 and 10                                                                                             |
|                          | <b>12b</b> | Definition of and rationale for test positivity cut-offs or result categories of the reference standard, distinguishing pre-specified from exploratory | 8 and 10                                                                                             |
|                          | <b>13a</b> | Whether clinical information and reference standard results were available to the performers/readers of the index test                                 | 6                                                                                                    |
|                          | <b>13b</b> | Whether clinical information and index test results were available to the assessors of the reference standard                                          | 8                                                                                                    |
| <i>Analysis</i>          | <b>14</b>  | Methods for estimating or comparing measures of diagnostic accuracy                                                                                    | 9-10                                                                                                 |
|                          | <b>15</b>  | How indeterminate index test or reference standard results were handled                                                                                | 8                                                                                                    |
|                          | <b>16</b>  | How missing data on the index test and reference standard were handled                                                                                 | 9-10                                                                                                 |
|                          | <b>17</b>  | Any analyses of variability in diagnostic accuracy, distinguishing pre-specified from exploratory                                                      | 10                                                                                                   |
|                          | <b>18</b>  | Intended sample size and how it was determined                                                                                                         | 9                                                                                                    |
| <b>RESULTS</b>           |            |                                                                                                                                                        |                                                                                                      |
| <i>Participants</i>      | <b>19</b>  | Flow of participants, using a diagram                                                                                                                  | Consort diagram not yet available as study protocol, but participant timeline available in figure 1. |
|                          | <b>20</b>  | Baseline demographic and clinical characteristics of participants                                                                                      | 9                                                                                                    |
|                          | <b>21a</b> | Distribution of severity of disease in those with the target condition                                                                                 | 9                                                                                                    |
|                          | <b>21b</b> | Distribution of alternative diagnoses in those without the target condition                                                                            | n/a                                                                                                  |
|                          | <b>22</b>  | Time interval and any clinical interventions between index test and reference standard                                                                 | 7                                                                                                    |
| <i>Test results</i>      | <b>23</b>  | Cross tabulation of the index test results (or their distribution) by the results of the reference standard                                            | 9                                                                                                    |
|                          | <b>24</b>  | Estimates of diagnostic accuracy and their precision (such as 95% confidence intervals)                                                                | 9                                                                                                    |
|                          | <b>25</b>  | Any adverse events from performing the index test or the reference standard                                                                            | 11                                                                                                   |
| <b>DISCUSSION</b>        |            |                                                                                                                                                        |                                                                                                      |
|                          | <b>26</b>  | Study limitations, including sources of potential bias, statistical uncertainty, and generalisability                                                  | n/a                                                                                                  |
|                          | <b>27</b>  | Implications for practice, including the intended use and clinical role of the index test                                                              | 10                                                                                                   |

| OTHER INFORMATION |    |                                                       |                  |
|-------------------|----|-------------------------------------------------------|------------------|
|                   | 28 | Registration number and name of registry              | n/a: in progress |
|                   | 29 | Where the full study protocol can be accessed         | n/a: in progress |
|                   | 30 | Sources of funding and other support; role of funders | 10               |

For peer review only

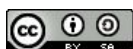

# STARD 2015

---

## AIM

STARD stands for “Standards for Reporting Diagnostic accuracy studies”. This list of items was developed to contribute to the completeness and transparency of reporting of diagnostic accuracy studies. Authors can use the list to write informative study reports. Editors and peer-reviewers can use it to evaluate whether the information has been included in manuscripts submitted for publication.

---

## EXPLANATION

A **diagnostic accuracy study** evaluates the ability of one or more medical tests to correctly classify study participants as having a **target condition**. This can be a disease, a disease stage, response or benefit from therapy, or an event or condition in the future. A medical test can be an imaging procedure, a laboratory test, elements from history and physical examination, a combination of these, or any other method for collecting information about the current health status of a patient.

The test whose accuracy is evaluated is called **index test**. A study can evaluate the accuracy of one or more index tests. Evaluating the ability of a medical test to correctly classify patients is typically done by comparing the distribution of the index test results with those of the **reference standard**. The reference standard is the best available method for establishing the presence or absence of the target condition. An accuracy study can rely on one or more reference standards.

If test results are categorized as either positive or negative, the cross tabulation of the index test results against those of the reference standard can be used to estimate the **sensitivity** of the index test (the proportion of participants *with* the target condition who have a positive index test), and its **specificity** (the proportion *without* the target condition who have a negative index test). From this cross tabulation (sometimes referred to as the contingency or “2x2” table), several other accuracy statistics can be estimated, such as the positive and negative **predictive values** of the test. Confidence intervals around estimates of accuracy can then be calculated to quantify the statistical **precision** of the measurements.

If the index test results can take more than two values, categorization of test results as positive or negative requires a **test positivity cut-off**. When multiple such cut-offs can be defined, authors can report a receiver operating characteristic (ROC) curve which graphically represents the combination of sensitivity and specificity for each possible test positivity cut-off. The **area under the ROC curve** informs in a single numerical value about the overall diagnostic accuracy of the index test.

The **intended use** of a medical test can be diagnosis, screening, staging, monitoring, surveillance, prediction or prognosis. The **clinical role** of a test explains its position relative to existing tests in the clinical pathway. A replacement test, for example, replaces an existing test. A triage test is used before an existing test; an add-on test is used after an existing test.

Besides diagnostic accuracy, several other outcomes and statistics may be relevant in the evaluation of medical tests. Medical tests can also be used to classify patients for purposes other than diagnosis, such as staging or prognosis. The STARD list was not explicitly developed for these other outcomes, statistics, and study types, although most STARD items would still apply.

---

## DEVELOPMENT

This STARD list was released in 2015. The 30 items were identified by an international expert group of methodologists, researchers, and editors. The guiding principle in the development of STARD was to select items that, when reported, would help readers to judge the potential for bias in the study, to appraise the applicability of the study findings and the validity of conclusions and recommendations. The list represents an update of the first version, which was published in 2003.

More information can be found on <http://www.equator-network.org/reporting-guidelines/stard>.

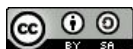

# BMJ Open

## Screening for Hypertension in the INpatient Environment (SHINE): A protocol for a Prospective Study of Diagnostic Accuracy among adult hospital patients

|                                 |                                                                                                                                                                                                                                                                                                                                                                                                                                                                                                                                                                                                                                                                                                                                                                                                                              |
|---------------------------------|------------------------------------------------------------------------------------------------------------------------------------------------------------------------------------------------------------------------------------------------------------------------------------------------------------------------------------------------------------------------------------------------------------------------------------------------------------------------------------------------------------------------------------------------------------------------------------------------------------------------------------------------------------------------------------------------------------------------------------------------------------------------------------------------------------------------------|
| Journal:                        | <i>BMJ Open</i>                                                                                                                                                                                                                                                                                                                                                                                                                                                                                                                                                                                                                                                                                                                                                                                                              |
| Manuscript ID                   | bmjopen-2019-033792.R1                                                                                                                                                                                                                                                                                                                                                                                                                                                                                                                                                                                                                                                                                                                                                                                                       |
| Article Type:                   | Protocol                                                                                                                                                                                                                                                                                                                                                                                                                                                                                                                                                                                                                                                                                                                                                                                                                     |
| Date Submitted by the Author:   | 05-Nov-2019                                                                                                                                                                                                                                                                                                                                                                                                                                                                                                                                                                                                                                                                                                                                                                                                                  |
| Complete List of Authors:       | Armitage, Laura; University of Oxford, Nuffield Department of Primary Care Health Sciences<br>Mahdi, Adam; University of Oxford, Institute of Biomedical Engineering, Department of Engineering Science<br>Lawson, Beth; University of Oxford, Nuffield Department of Primary Care Health Sciences<br>Roman, Cristian; University of Oxford, Institute of Biomedical Engineering, Department of Engineering Science<br>Fanshawe, Thomas; University of Oxford, Nuffield Department of Primary Care Health Sciences<br>Tarassenko, Lionel; University of Oxford, Institute of Biomedical Engineering, Department of Engineering Science<br>Farmer, Andrew; University of Oxford, Nuffield Department of Primary Care Health Sciences<br>Watkinson, Peter; University of Oxford, Nuffield Department of Clinical Neurosciences |
| <b>Primary Subject Heading</b>: | Cardiovascular medicine                                                                                                                                                                                                                                                                                                                                                                                                                                                                                                                                                                                                                                                                                                                                                                                                      |
| Secondary Subject Heading:      | Diagnostics                                                                                                                                                                                                                                                                                                                                                                                                                                                                                                                                                                                                                                                                                                                                                                                                                  |
| Keywords:                       | Hypertension < CARDIOLOGY, PUBLIC HEALTH, GENERAL MEDICINE (see Internal Medicine)                                                                                                                                                                                                                                                                                                                                                                                                                                                                                                                                                                                                                                                                                                                                           |
|                                 |                                                                                                                                                                                                                                                                                                                                                                                                                                                                                                                                                                                                                                                                                                                                                                                                                              |

SCHOLARONE™  
Manuscripts

**Title of Article:**

Screening for Hypertension in the INpatient Environment (SHINE): A protocol for a  
Prospective Study of Diagnostic Accuracy among adult hospital patients

**Corresponding author:**

Laura C Armitage  
Nuffield Department of Primary Care Health Sciences,  
Radcliffe Primary Care Building  
Radcliffe Observatory Quarter,  
Woodstock Road,  
Oxford  
OX2 6GG  
Email: [laura.armitage@phc.ox.ac.uk](mailto:laura.armitage@phc.ox.ac.uk)  
Tel: 01865 289259

**Co-authors:**

Adam Mahdi<sup>a</sup>  
Beth K Lawson<sup>b</sup>  
Cristian Roman<sup>a</sup>  
Thomas R Fanshawe<sup>b</sup>  
Lionel Tarassenko<sup>a</sup>  
Andrew J Farmer<sup>b</sup>  
Peter J Watkinson<sup>c</sup>

<sup>a</sup>Institute of Biomedical Engineering, Department of Engineering Science, University of Oxford, Oxford, UK

<sup>b</sup>Nuffield Department of Primary Care Health Sciences, University of Oxford, Oxford, UK

<sup>c</sup>Nuffield Department of Clinical Neurosciences, University of Oxford, Oxford, UK

**Word Count (excluding title page, abstract, references, figures and tables): 3413**

## ABSTRACT

### Introduction

A significant percentage of patients admitted to hospital have undiagnosed hypertension. However, present hypertension guidelines in the UK, Europe and USA do not define a blood pressure threshold at which hospital inpatients should be considered at risk of hypertension, outside of the emergency setting. The objective of this study is to identify the optimal in-hospital mean blood pressure threshold, above which patients should receive post-discharge blood pressure assessment in the community.

### Methods and Analysis

SHINE is a prospective diagnostic accuracy study. Patients admitted to hospital whose mean average daytime blood pressure after 24 hours or longer meets the study eligibility threshold for mean daytime blood pressure ( $\geq 120/70$ mmHg) and who have no prior diagnosis of, or medication for hypertension will be eligible. At 8 weeks post-discharge, recruited participants will wear an ambulatory blood pressure monitor for 24 hours. Mean daytime ambulatory blood pressure will be calculated to assess for the presence or absence of hypertension. Diagnostic performance of in-hospital blood pressure will be assessed by constructing Receiver Operator Characteristic (ROC) curves from participants' in-hospital mean systolic and mean diastolic blood pressure (index test) versus diagnosis of hypertension determined by mean daytime ambulatory blood pressure (reference test).

### Ethics and Dissemination

Ethical approval has been provided by the NHS Health Research Authority South Central – Oxford B Research Ethics Committee (19/SC/0026). Findings will be disseminated through national and international conferences, peer-reviewed journals and social media.

### STRENGTHS AND LIMITATIONS OF THIS STUDY

- This is the first study to our knowledge to evaluate the diagnostic accuracy of a range of in-hospital blood pressure thresholds to identify the optimal blood pressure cut-off values for in-hospital hypertension screening.
- This is also the first study to our knowledge, to use real-time algorithms to screen hospital inpatients' electronic blood pressure data.



- Owing to the novel design of this study, the expected prevalence of hypertension at follow up is unknown and has therefore been estimated to calculate the sample size.

For peer review only

1  
2  
3  
4  
5  
6  
7  
8  
9  
10  
11  
12  
13  
14  
15  
16  
17  
18  
19  
20  
21  
22  
23  
24  
25  
26  
27  
28  
29  
30  
31  
32  
33  
34  
35  
36  
37  
38  
39  
40  
41  
42  
43  
44  
45  
46  
47  
48  
49  
50  
51  
52  
53  
54  
55  
56  
57  
58  
59  
60

## INTRODUCTION

Hypertension is the leading risk factor for death globally[1] with 12.8% of annual mortality attributable to hypertension.[2] A significant percentage of patients admitted to hospital have undiagnosed hypertension.[3,4] However, unless a person has severely elevated blood pressure, the clinical diagnosis of hypertension cannot be made in the in-hospital setting based on the UK, European or American Guidelines.[5–7] Indeed, increased blood pressure values in hospital are frequently dismissed and additional potential reasons for this include clinicians attributing increased blood pressure values to anxiety,[8] pain[9] or white coat hypertension.[10] However, evidence suggests that patients with elevated blood pressure recordings in hospital frequently remain hypertensive in the community.[11–17] Despite this, referral for community follow-up of these patients to determine the presence or absence of persistent hypertension is poor.[18–21]

Untreated hypertension is associated with a progressive increase in blood pressure that can become treatment resistant.[22] Therefore, hospital detection and subsequent management of hypertension offer an important intervention opportunity to address this major cause of morbidity and mortality.

In 2015, Oxford University Hospitals NHS Foundation Trust (OUHFT) introduced the NIHR-funded System for Electronic Notification and Documentation (SEND).[23] SEND is a tailored software application which links hospital bedside monitoring devices including blood pressure monitors, with a tablet computer for the manual recording of vital-sign observations of patients.[24] Since this implementation, clinicians and researchers have been able to access and analyse patient observation data at a population as well as individual level. SEND has been used to record the vital-sign observations of more than 200,000 patients so far and to link each patient's observations with their Electronic Patient Record (EPR).[24] This has paved the way for real-time and automated recognition of patients whose observations indicate they may be at increased risk of undiagnosed hypertension.

The objective of this study is to identify the optimal in-hospital mean blood pressure threshold, above which patients should receive post-discharge blood pressure assessment in the community.

## METHODS AND ANALYSIS

We prepared this protocol following the STARD[25] guidelines.

### Patient and Public Involvement

1  
2  
3 The design of this study has been reviewed and supported by patient and public representatives  
4 who have provided input on the research questions, data analysis, informational material for public  
5 engagement and the burden of the follow-up diagnostic testing from a patient's perspective. Their  
6 input led to additional steps in data analysis, refining of the informational material and modification  
7 of the follow-up plan to reduce patient burden.  
8  
9  
10  
11  
12

### 13 **Study Design**

14 This is a UK single-centre, prospective cohort diagnostic accuracy study. The study is due to commence  
15 in November 2019 and active follow-up will continue until January 2022.  
16  
17  
18  
19

### 20 **Study Setting**

21 Recruitment for this study will take place in Oxford University Hospitals NHS Foundation Trust, UK.  
22 Participants will be followed up in a community research clinic at 8 weeks (+/-4) following discharge  
23 from hospital to receive reference blood pressure testing. Participant timeline is shown in Figure 1.  
24  
25  
26  
27  
28

### 29 **Study Population**

30 We will recruit participants aged between 18 and 80 years, who have at least two blood pressure  
31 measurements taken during daytime hours defined as 07:00:00 to 21:59:59[26] and at least one blood  
32 pressure measurement taken during night time hours (22:00:00 to 06:59:59). To be eligible a patient's  
33 cumulative mean daytime systolic blood pressure must be between 120mmHg and 179mmHg and  
34 cumulative mean daytime diastolic blood pressure  $\leq 109$ mmHg for any given 24-hour interval since  
35 their admission to hospital following the first 24 hours of their admission (index test) - see TEST  
36 METHODS below for more details. The mean daytime blood pressure calculation must be based on a  
37 minimum of two blood pressure measurements made during day time hours. No lower eligibility  
38 threshold was set for the diastolic blood pressure in order that patients with isolated systolic  
39 hypertension would not be excluded. Patients with an ICD10 code for hypertension or blood pressure  
40 lowering medication prescribed in their medication record will be excluded. Additional exclusion  
41 criteria include current, intended or recent pregnancy, cause for index admission being associated  
42 with end-organ damage related to severe hypertension (including but not limited to heart failure,  
43 myocardial infarction, stroke, hypertensive encephalopathy) and estimated glomerular filtration  
44 rate of  $<30$  ml/min. Full inclusion and exclusion criteria are provided in Table 1.  
45  
46  
47  
48  
49  
50  
51  
52  
53  
54  
55  
56

### 57 **Inclusion Criteria**

### 58 **Exclusion criteria**

1  
2  
3 Aged 18-80  
4  
5  
6

Pre-existing diagnosis of hypertension or attending hospital with acute end-organ damage related to severe, undiagnosed hypertension.

7  
8 Admitted to hospital for an acute or elective  
9 medical or surgical condition

Presence of atrial fibrillation or other pulse rate irregularity which means ABPM is not appropriate.

10  
11 Have at least three in-hospital blood pressure  
12 recordings with two performed during day time  
13 hours and 1 performed during night time hours,  
14 over a minimum of 24 hours for the index  
15 admission.  
16

Currently pregnant, within 3 months post-partum or planning pregnancy during study period.

17  
18 Identified by the blood pressure algorithm for  
19 any 24-hour interval to have a mean blood  
20 pressure which meets the eligibility thresholds.  
21  
22

Receiving treatments which might be used for the management of hypertension, e.g. beta blockers for migraine, angiotensin-converting-enzyme inhibitors for renal disease.

23  
24 Registered with a General Practitioner.  
25  
26

Diagnosed with terminal illness or cognitive impairment.

Diagnosed with AKI on index admission or eGFR <30ml/min.

Cause for hypertension being toxicology, medical or recreational e.g amphetamines and their derivatives or alcohol withdrawal syndrome.

Post-discharge destination being another hospital or prison.

Receiving concomitant chemotherapy.

Already recruited to a separate hypertension study.

27  
28  
29  
30  
31  
32  
33  
34  
35  
36  
37  
38  
39  
40  
41  
42 *Table 1. Full inclusion and exclusion criteria*

43 *ABPM = ambulatory blood pressure monitoring, AKI = acute kidney injury,*

44  
45  
46  
47 **Screening procedure**

48  
49 The identification of patients whose blood pressure exceeds the index test threshold will be  
50 automated using live, computerised algorithms. Blood pressure measurements in the Oxford  
51 University Hospitals NHS Foundation Trust are made using automated oscillometric devices and the  
52 BP monitor readings (systolic and diastolic) are entered manually using the SEND computer tablet  
53 before automated transfer to the electronic patient record (EPR) by the SEND software app.[23] The  
54 identification of patients whose blood pressure measurements meet eligibility criteria will be  
55 computerised and automated. These automated systems for blood pressure documentation and  
56  
57  
58  
59  
60

1  
2  
3 evaluating study inclusion criteria are intended to ensure that the measurement of the index test is  
4 objective and thus the clinical staff who perform the blood pressure measurements can be considered  
5 blinded in the assessment of the index test. As this study is prospective in design they will not be  
6 aware of the result of the reference standard.  
7  
8  
9

### 10 11 **Participant sampling**

12 Sampling will be stratified to ensure that there is representation of patients with a full range of in-  
13 hospital blood pressure profiles (according to pre-defined mean daytime systolic blood pressure,  
14 Table 2). Patients who are considered eligible according to the screening algorithm will be approached  
15 by a clinical researcher who will undertake a further screen of patient eligibility. Patients who are in  
16 significant or uncontrolled pain will not be recruited unless and until, their pain improves. Pain scales  
17 will be collected at baseline for all recruited participants. Where there is insufficient study resource to  
18 enrol all recruitable patients, priority will be given to the strata with the least recruited patients.  
19 Recruitment will continue until the target recruitment number within each of the blood pressure  
20 intervals is achieved. The prevalence of each systolic blood pressure interval among the hospital  
21 population will be recorded within a screening log during the study period.  
22  
23  
24  
25  
26  
27  
28  
29  
30  
31

| Systolic blood pressure Interval | Target recruitment number    |
|----------------------------------|------------------------------|
| 120-129                          | Approximately equal          |
| 130-139                          | representation of            |
| 140-149                          | participants recruited to    |
| 150-159                          | each of these systolic blood |
| 160-179                          | pressure intervals           |
| <b>TOTAL</b>                     | <b>200</b>                   |

32  
33  
34  
35  
36  
37  
38  
39  
40  
41  
42  
43 *Table 2. Systolic blood pressure intervals against which recruitment will be stratified*

### 44 45 46 47 **Data Collection**

48 Baseline data collection will be performed at the point of recruitment during the hospital admission,  
49 after the participant has provided informed, written consent. Custom-made baseline case report  
50 forms (CRFs) will be completed in the study data capture system for each participant by an  
51 appropriately qualified clinical researcher. The study data capture system will be electronic and  
52 accessible online. using a combination of data extracted from the EPR (e.g. diagnostic codes, current  
53 medications, serum haematology and biochemistry results and electrocardiogram) and participant  
54 self-report (e.g. ethnicity family history, previous prescribed medications for hypertension). Any  
55  
56  
57  
58  
59  
60

1  
2  
3 extreme values entered into the electronic data capture system will be inspected. A data monitoring  
4 committee has not been convened since there is no concealed allocation to treatment in this cohort  
5 study. Frequency and procedures for auditing study conduct are determined by the study sponsor  
6 (University of Oxford) based on a proportionate approach to risks.  
7  
8  
9

## 10 11 12 13 **TEST METHODS**

### 14 15 16 **Index Diagnostic Test**

17 The index test will be the first occurrence during the hospital stay of a cumulative mean daytime in-  
18 hospital blood pressure reading  $\geq 135$ mmHg systolic or  $\geq 85$ mmHg diastolic. The systolic blood pressure  
19 eligibility threshold has been defined as 10mmHg below the index test threshold to understand the  
20 frequency of true and false negatives in order to calculate sensitivity and specificity of the diagnostic  
21 test.  
22  
23  
24  
25  
26  
27

28 Blood pressure measurements from the point of admission to the time of assessment by the algorithm  
29 (every 24 hours at midnight until day 10 of the admission or discharge, whichever occurred first) will  
30 be averaged to reduce the chances of a person becoming eligible by chance when compared to the  
31 alternative, of assessing a person's eligibility based on their mean day time blood pressure for any 24-  
32 hour interval. Thus, for each patient at each time of assessment, we will compute the cumulative  
33 mean BP value using all the available daytime (7:00:00-21:59:59) BP readings. The cumulative mean  
34 is defined here to be the mean of the mean daytime BP values, the latter being calculated for each of  
35 the days between the point of admission and the time of assessment. As the first occurrence of the  
36 test being passed is a necessary and sufficient condition, a patient will be recruited into the study even  
37 if their cumulative mean at discharge is below the index test thresholds ( $\geq 135$ mmHg systolic or  
38  $\geq 85$ mmHg diastolic).  
39  
40  
41  
42  
43  
44  
45  
46  
47

48 A day time definition was chosen as this study is being performed in a UK healthcare setting, where  
49 at present, night time measurements are not used the diagnosis of hypertension.[27] The index test  
50 has been defined according to the UK NICE Guideline definition of daytime hypertension.[27]  
51  
52  
53  
54

55 Additionally, a subgroup of participants will receive a research standard blood pressure assessment in  
56 hospital, performed according to the standard recommended by the UK NICE Guidelines.[27] The  
57 blood pressure will be measured using a validated and calibrated oscillometric device by a trained  
58  
59  
60

1  
2  
3 clinical researcher. Blood pressure will be measured with the patient seated and the arm outstretched  
4 and supported. Blood pressure will be measured in both arms and if a between-arm difference of  
5  $\geq 15$  mmHg is found both measurements will be repeated. Where a difference persists, the arm with  
6 the highest measurement will be used for subsequent measurements. Two measurements will be  
7 taken in the selected arm; if the second measurement is substantially different from the first then a  
8 third measurement will be taken and the lowest of the second and third measurements will be  
9 recorded.

### 16 **Reference Standard Diagnostic Test**

17  
18 The gold standard diagnostic test for the presence of hypertension will be a daytime 24-hour  
19 ambulatory blood pressure threshold of  $\geq 135$  mmHg systolic or  $\geq 85$  mmHg diastolic, which is the  
20 current UK National Institute for Health and Care Excellence (NICE) diagnostic threshold for  
21 Ambulatory Blood Pressure Monitoring (ABPM).[5]  
22  
23

24  
25  
26 ABPM will be performed with each participant at 8 weeks (+/-4) following discharge from hospital  
27 using a validated automated Mobil-O-Graph ambulatory blood pressure monitor (IEM GmbH,  
28 Stolberg, Germany), calibrated to manufacturer standards. Should the participant have acquired a  
29 diagnosis of hypertension and initiated treatment for hypertension following hospital discharge but  
30 before they receive ABPM, they will not be eligible to proceed with ABPM. In this instance a participant  
31 will be regarded as being reference test positive, having acquired a clinical diagnosis of hypertension.  
32 The monitor will be programmed to measure blood pressure twice per hour during waking hours for  
33 (07:00 to 22:00), and once per hour during the sleeping hours (22:00 to 07:00) for a period of 24 hours,  
34 according to the British and Irish Hypertension Society (BIHS) Standard Operating Procedure for  
35 performing ABPM.[26] Adjustments will be made for example, where a participant will be working a  
36 shift pattern during the period of wear. All participants will be asked to log their sleeping and waking  
37 times in an ABPM diary and these will be used to analyse the ABPM results. According to the BIHS  
38 Standard Operating Procedure for ABPM, minimum of 14 waking time ABPM measurements must be  
39 successful in order to calculate the mean daytime blood pressure. Where fewer than 14 of the waking  
40 time ABPM measurements are successful, the participant will be asked to wear the monitor for a  
41 further period in order to collect adequate data. In the instance of two episodes of ABPM not  
42 collecting sufficient data, the participant and their registered General Practitioner (GP) will be  
43 informed along with recommendation that the participant arrange an appointment with their GP for  
44 further evaluation of their blood pressure. The participant will continue to be followed up remotely  
45 through the online data capture system for up to 52 weeks from recruitment (Figure 1). Links to the  
46  
47  
48  
49  
50  
51  
52  
53  
54  
55  
56  
57  
58  
59  
60

1  
2  
3 questionnaires will be sent to participants by email and we will collect data regarding blood pressure  
4 related health outcomes, the prescription of antihypertensive medications and repeat blood pressure  
5 measurements. At ten years, data will be obtained from the Office of National Statistics and Hospital  
6 Episode Statistics Databases regarding mortality and cardiovascular health related outcomes.  
7  
8  
9

10  
11 The fitting and removal of the ambulatory blood pressure monitor will be performed by a qualified  
12 clinical research nurse who is appropriately trained in the National Institute for Health's Good Clinical  
13 Practice and to perform ABPM. At the time of removal of the monitor, the electronic ABPM report will  
14 be downloaded to the study data capture system and interpreted by the research nurse. As the  
15 reference test procedure is objective through the use of an oscillometric, automated ABPM, the  
16 research nurse will not be blinded to the result of the index blood pressure test.  
17  
18  
19  
20  
21  
22

23 The same subgroup of 50 participants who received a standardised research blood pressure  
24 assessment in hospital will receive a standardised research clinic blood pressure upon ABPM fitting.  
25 The procedure for measuring and recording the blood pressure will be exactly the same as described  
26 for the hospital setting, according to that recommended by the UK NICE Guidelines.[27]  
27  
28  
29  
30

## 31 **STATISTICAL METHODS**

### 32 **Sample size**

33  
34  
35  
36 Owing to the novel design of this study, estimates of expected prevalence of hypertension at follow-  
37 up have been used to calculate sample size. From a retrospective analysis of in-hospital OUHFT  
38 blood pressure data, we estimate that 3000 patients per annum will be eligible for study inclusion  
39 (Mahdi, A, 2019; Prevalence of hypertension and undiagnosed hypertension in a large inpatient  
40 population). Previous studies have used an in-hospital blood pressure eligibility threshold  
41 (140/90mmHg) and revealed approximately that half of the patients with a blood pressure above  
42 the threshold have hypertension at follow-up.[28,29] A lower rate of hypertension at follow-up is  
43 expected in this study owing to the lower eligibility blood pressure threshold of 120/70mmHg; a  
44 sample size of 200 has been derived to permit detection of a 20% rate of hypertension at follow-up  
45 with a 95% confidence interval width of approximately of  $\pm 5.36\%$ . Screening logs will be recorded  
46 for both the algorithm and the manual screening process to understand the prevalence of patients  
47 falling in each of the in-hospital blood pressure intervals against which recruitment will be stratified.  
48  
49  
50  
51  
52  
53  
54  
55  
56  
57  
58

### 59 **Baseline characteristics**



1  
2  
3 Clinical and demographic characteristics of the study population will be reported, including age, sex,  
4 presenting complaint, comorbidity, current treatments (including oral steroidal and non-steroidal  
5 anti-inflammatory medications), pain score (using an 11-point Likert scale where 0= no pain and 10 =  
6 maximum possible pain) for the preceding 24 hours to recruitment and the Six-Item State Anxiety  
7 Scale.[30] The number of participants who complete each stage of the protocol will be reported,  
8 including those who complete successful ABPM, with reasons for failed testing where appropriate.  
9 Recruitment and study completion figures will be reported using a participant flow diagram.  
10 Interpretation of the ABPM result will be performed by researchers who are blind to the participant's  
11 index blood pressure test.  
12  
13  
14  
15  
16  
17  
18  
19

### 20 **Index Test Performance**

21 Diagnostic performance of in-hospital blood pressure will be assessed by constructing Receiver  
22 Operator Characteristic (ROC) curves from participants' in-hospital mean systolic or mean diastolic  
23 blood pressure (index test) versus diagnosis of hypertension determined by mean daytime ambulatory  
24 systolic and diastolic blood pressure (reference test). At first instance a complete case analysis will be  
25 performed by excluding participants without an observed test result. At the second instance, for  
26 participants with missing ABPM values, the data will be imputed. The two approaches will be  
27 compared and the number of cases with missing values will be reported, together with detailed  
28 description of the strategy for handling the missing data. The Area Under the Receiver Operator Curve  
29 (AUROC) will be calculated to estimate the discriminatory power of the diagnostic test.[31] Potential  
30 diagnostic blood pressure thresholds will then be identified from the ROC curve.[31,32] The diagnostic  
31 ability of each potential cut-off threshold will be evaluated using two-by-two tables[32] to compare  
32 sensitivity and specificity of each potential threshold. Confidence intervals will be reported for each  
33 value. Reproducibility of the index test and variability in diagnostic accuracy will be analysed using  
34 subsequent available periods of the hospital admission in which participants' mean in-hospital blood  
35 pressure values were at or above the recruitment threshold.  
36  
37  
38  
39  
40  
41  
42  
43  
44  
45  
46  
47  
48

### 49 **Subgroup Analyses**

50 Logistic regression analyses will be performed to estimate whether the diagnostic performance of in-  
51 hospital mean blood pressure is influenced by participant baseline characteristics, including age, sex  
52 body mass index and comorbidity, pain, anxiety and in-hospital prescriptions such as oral steroid  
53 medications and non-steroidal anti-inflammatory medications. Further subgroup analyses will include  
54 whether the index admission was scheduled or unscheduled and whether the admitting specialty was  
55 medical or surgical.  
56  
57  
58  
59  
60

## Additional analyses

Once the optimal thresholds for the in-hospital screening for hypertension have been identified, diagnostic accuracy of the thresholds at successive 24-hour intervals of patient admission will be estimated. Whilst the reference test for this study is based on the current UK diagnostic criteria for the diagnosis of hypertension which concerns daytime blood pressure measurements only, there is increasing evidence in the literature to support the association between nocturnal hypertension and cardiovascular risk.[33,34] Therefore, additional analyses will be performed incorporating night time measurements and using the European and American diagnostic thresholds for hypertension as shown in table 3.[6,7]

| ABPM diagnostic thresholds for hypertension | European Society of Cardiology/European Society of Hypertension |           | American College of Cardiology |           |
|---------------------------------------------|-----------------------------------------------------------------|-----------|--------------------------------|-----------|
|                                             | Systolic                                                        | Diastolic | Systolic                       | Diastolic |
| 24-hour                                     | 130                                                             | 80        | 125                            | 75        |
| Night                                       | 120                                                             | 70        | 110                            | 65        |
| Day                                         | 135                                                             | 85        | 130                            | 80        |

*Table 3, European Society of Cardiology/European Society of Hypertension[6] and American College of Cardiology[7] diagnostic thresholds for hypertension.*

## ETHICS AND DISSEMINATION

### Ethics

This study (Protocol Version 1.7) has been given ethical approval from the NHS Health Research Authority South Central – Oxford B Research Ethics Committee (19/SC/0026). Any planned protocol modifications will receive further sponsor and ethical review and require approval prior to implementation. Any approved modifications will be communicated in the ISRCTN Registry where the study is registered. All participants will be required to give informed, written consent and will be advised that they can withdraw from the study at any time and without giving reason. Consent will be obtained by a trained clinical researcher.

We do not anticipate any harms from the use of ABPM, which is already a standard procedure for the diagnosis of hypertension in UK primary care and therefore this study does not carry any significant risk to participants. The measurement of ambulatory blood pressure among the participants of this study is in addition to usual care and may be considered beneficial if we detect the presence of undiagnosed hypertension earlier than may have otherwise been the case. If at any point a participant

1  
2  
3 is found to have severely raised blood pressure, their responsible hospital care team or General  
4 Practitioner will be informed, following study Standard Operating Procedures, according to whether  
5 severely elevated blood pressure was observed in the hospital or community, respectively. Any  
6 adverse events which arise as a result of performing ABPM will be reported. The participant and their  
7 General Practitioner will both be informed of the ABPM result and any decision to initiate treatment  
8 will be made between the patient and their General Practitioner in line with standard care.  
9  
10  
11  
12

13  
14  
15 Data will be analysed by researchers based in the University of Oxford (Nuffield Department of Clinical  
16 Neurosciences, Nuffield Department of Primary Care Health Sciences and Institute of Biomedical  
17 Engineering).

### 21 **Dissemination**

22  
23 Findings from this study will be disseminated through peer-reviewed journals, conferences, public  
24 engagement activities and online. Participants will be able to access results online.  
25  
26

### 28 **Discussion**

29  
30 The SHINE study will be the first study to our knowledge, to evaluate the diagnostic accuracy of in-  
31 hospital blood pressure measurements on a continuous scale and therefore identify the optimal blood  
32 pressure cut-off values for in-hospital hypertension screening. A recent systematic review indicates  
33 this will be the first study to use real-time algorithms to screen hospital inpatients' electronic blood  
34 pressure data.[17] The automated detection and subsequent treatment of previously undiagnosed  
35 hypertension has the potential to prevent the development of serious hypertension-related diseases.  
36  
37  
38  
39

40  
41  
42 The study is limited by uncertainty in the expected prevalence of hypertension at follow-up, which has  
43 been used to estimate the required sample size.  
44  
45

### 47 **Funding and Sponsor**

48  
49 This study is funded by the National Institute for Health (NIHR) Oxford Biomedical Research Centre  
50 (BRC) Technology and Digital Health theme. The views expressed are those of the authors and not  
51 necessarily those of the NIHR or the Department of Health and Social Care. AF is an NIHR Senior  
52 Investigator. The sponsor is the University of Oxford. The sponsor has provided ethical and legal  
53 guidance in study conduction. Neither the funder nor sponsor have had or will have, any role in study  
54 design, collection, management, analysis, interpretation of data or writing of the report.  
55  
56  
57  
58  
59  
60

### Author Contributions

PJW is the principal investigator. LCA, PJW, AJF, AM, CR and LT made substantial contributions to the conception and design of the project. BL has contributed significantly to protocol development. TF provided advice on statistical methodology. All authors contributed to and revised the final manuscript.

### Data sharing

Data will be made available as appropriate following review of the research proposal by the Kadoorie Centre for Critical Care Research and Education data access committee.

### Competing Interests

PW and LT are the Chief Medical Officer and R&D Director for Sensyne Health and hold share options in the company. Their University departments receive research funding from Sensyne Health.

### REFERENCES

- 1 Campbell NRC, Lackland DT, Niebylski ML. High Blood Pressure: Why Prevention and Control Are Urgent and Important-A 2014 Fact Sheet From the World Hypertension League and the International Society of Hypertension. *J Clin Hypertens* 2014;**16**:551–3. doi:10.1111/jch.12372
- 2 World Health Organisation. Global Health Observatory (GHO) data: Raised blood pressure. WHO Published Online First: 2015.[http://www.who.int/gho/ncd/risk\\_factors/blood\\_pressure\\_prevalence\\_text/en/](http://www.who.int/gho/ncd/risk_factors/blood_pressure_prevalence_text/en/) (accessed 27 Feb 2018).
- 3 Shankar BS, Russell RP, Southard JW, *et al.* Patterns of Care for Hypertension Among Hospitalized Patients. *Public Health Rep* 1982;**97**:521–7.<https://www.ncbi.nlm.nih.gov/pmc/articles/PMC1424386/pdf/pubhealthrep00114-0023.pdf> (accessed 27 Feb 2018).
- 4 Greenland P, Levenkron JC, Smith RM. Hospitalization as an Opportunity to Improve Hypertension Recognition and Control. *Source Med Care* 1987;**25**:717–23.<http://www.jstor.org/stable/3765708> (accessed 27 Feb 2018).
- 5 National Institute for Health and Care Excellence. Clinical Guideline CG127. Hypertension in adults: diagnosis and management. 2011.<https://www.nice.org.uk/guidance/cg127> (accessed 2 Aug 2018).
- 6 Williams B, Mancia G, Spiering W, *et al.* 2018 ESC/ESH Guidelines for the management of arterial hypertension. *J Hypertens* 2018;**36**:1953–2041. doi:10.1097/HJH.0000000000001940

- 1  
2  
3 7 Whelton PK, Carey RM, Aronow WS, *et al.* 2017  
4 ACC/AHA/AAPA/ABC/ACPM/AGS/APhA/ASH/ASPC/NMA/PCNA Guideline for the Prevention,  
5 Detection, Evaluation, and Management of High Blood Pressure in Adults. *J Am Coll Cardiol*  
6 2018;**71**:e127–248. doi:10.1016/j.jacc.2017.11.006  
7  
8  
9  
10 8 Backer HD, Decker L, Ackerson L. Reproducibility of increased blood pressure during an  
11 emergency department or urgent care visit. *Ann Emerg Med* 2003;**41**:507–12.  
12 doi:10.1067/MEM.2003.151  
13  
14  
15 9 Tanabe P, Cline DM, Cienki JJ, *et al.* Barriers to screening and intervention for ED patients at  
16 risk for undiagnosed or uncontrolled hypertension. *J Emerg Nurs* 2011;**37**:17–23.  
17 doi:10.1016/j.jen.2009.11.017  
18  
19  
20 10 Khan T V, Khan SS-S, Akhondi A, *et al.* White coat hypertension: relevance to clinical and  
21 emergency medical services personnel. *Medscape Gen Med*  
22 2007;**9**:52. <http://www.ncbi.nlm.nih.gov/pubmed/17435652> (accessed 22 Aug 2018).  
23  
24  
25 11 EUROASPIRE Study Group. EUROASPIRE. A European Society of Cardiology survey of  
26 secondary prevention of coronary heart disease: principal results. E. *Eur Heart J*  
27 1997;**18**:1569–82. <http://www.ncbi.nlm.nih.gov/pubmed/9347267> (accessed 27 Feb 2018).  
28  
29  
30 12 EUROASPIRE II Study Group. Lifestyle and risk factor management and use of drug therapies  
31 in coronary patients from 15 countries: Principal results from EUROASPIRE II Euro Heart  
32 Survey Programme. *Eur Heart J* 2001;**22**:554–72. <http://www.idealibrary.com> (accessed 27  
33 Feb 2018).  
34  
35  
36 13 Jankowski P, Kawecka-Jaszcz K, Bilo G, *et al.* Determinants of poor hypertension management  
37 in patients with ischaemic heart disease. *Blood Press* 2005;**14**:284–92.  
38 doi:10.1080/08037050500239962  
39  
40  
41 14 Conen D, Martina B, Perruchoud AP, *et al.* High prevalence of newly detected hypertension in  
42 hospitalized patients: the value of in-hospital 24-h blood pressure measurement. *J Hypertens*  
43 2006;**24**:301–6. <https://insights.ovid.com/pubmed?pmid=16508576> (accessed 26 Feb 2018).  
44  
45  
46 15 Kotseva K, Wood D, Backer G De, *et al.* EUROASPIRE III: a survey on the lifestyle, risk factors  
47 and use of cardioprotective drug therapies in coronary patients from 22 European countries.  
48 *Eur J Cardiovasc Prev Rehabil* 2009;**16**:121–37. doi:10.1097/HJR.0b013e3283294b1d  
49  
50  
51 16 Kotseva K, Wood D, De Bacquer D, *et al.* EUROASPIRE IV: A European Society of Cardiology  
52 survey on the lifestyle, risk factor and therapeutic management of coronary patients from 24  
53 European countries. *Eur J Prev Cardiol* 2016;**23**:636–48. doi:10.1177/2047487315569401  
54  
55  
56 17 Armitage LC, Whelan ME, Watkinson PJ, *et al.* Screening for hypertension using emergency  
57 department blood pressure measurements can identify patients with undiagnosed  
58  
59  
60

- hypertension: A systematic review with meta-analysis. *J Clin Hypertens (Greenwich)* 2019;:jch.13643. doi:10.1111/jch.13643
- 18 Tilman K, DeLashaw M, Lowe S, *et al.* Recognizing asymptomatic elevated blood pressure in ED patients: how good (bad) are we? *Am J Emerg Med* 2007;**25**:313–7. doi:10.1016/J.AJEM.2006.09.007
- 19 Baumann BM, Cienki JJ, Cline DM, *et al.* Evaluation, management, and referral of elderly emergency department patients with elevated blood pressure. *Blood Press Monit* 2009;**14**:251–6. doi:10.1097/MBP.0b013e328332fd40
- 20 Lehrmann JF, Tanabe P, Baumann BM, *et al.* Knowledge Translation of the American College of Emergency Physicians Clinical Policy on Hypertension. *Acad Emerg Med* 2007;**14**:1090–6. doi:10.1111/j.1553-2712.2007.tb02394.x
- 21 Baumann BM, Cline DM, Cienki JJ, *et al.* Provider Self-Report and Practice: Reassessment and Referral of Emergency Department Patients With Elevated Blood Pressure. *Am J Hypertens* 2009;**22**:604–10. doi:10.1038/ajh.2009.44
- 22 National Institute for Health and Clinical Excellence. Guideline scope: Hypertension in adults (update). 2017. <https://www.nice.org.uk/guidance/GID-NG10054/documents/draft-scope> (accessed 27 Feb 2018).
- 23 Wong D, Bonnici T, Knight J, *et al.* SEND: a system for electronic notification and documentation of vital sign observations. *BMC Med Inform Decis Mak* 2015;**15**:68. doi:10.1186/s12911-015-0186-y
- 24 Wong D. SEND: System for Electronic Notification and Documentation. <http://www.send-system.co.uk/about.html> (accessed 2 Aug 2018).
- 25 Cohen JF, Korevaar DA, Altman DG, *et al.* STARD 2015 guidelines for reporting diagnostic accuracy studies: explanation and elaboration. *BMJ Open* 2016;**6**:e012799. doi:10.1136/bmjopen-2016-012799
- 26 British and Irish Hypertension Society. Standard Operating Procedure for Ambulatory Blood Pressure Monitoring (ABPM). 2011. <https://bihsoc.org/resources/bp-measurement/abpm/> (accessed 11 Aug 2018).
- 27 National Institute for Health and Care Excellence. Hypertension in adults: diagnosis and management. NICE 2019. <https://www.nice.org.uk/guidance/ng136> (accessed 16 Oct 2019).
- 28 Tsoi LCH, Tung CCH, Wong ELY. Nurse-led hypertension referral system in an emergency department for asymptomatic elevated blood pressure. *Hong Kong Med J* 2012;**18**:201–6. <http://www.ncbi.nlm.nih.gov/pubmed/22665683> (accessed 2 Aug 2018).
- 29 Arhami Dolatabadi A, Motamedi M, Hatamabadi H, *et al.* Prevalence of undiagnosed

- 1  
2  
3 hypertension in the emergency department. *Trauma Mon* 2014;**19**:e7328.  
4 doi:10.5812/traumamon.7328  
5  
6 30 Marteau TM, Bekker H. The development of a six-item short-form of the state scale of the  
7  
8 Spielberger State-Trait Anxiety Inventory (STAI). *Br J Clin Psychol* 1992;**31**:301–6.  
9  
10 doi:10.1111/j.2044-8260.1992.tb00997.x  
11  
12 31 Greiner M, Pfeiffer D, Smith RD. Principles and practical application of the receiver-operating  
13  
14 characteristic analysis for diagnostic tests. *Prev Vet Med* 2000;**45**:23–  
15  
16 41. <http://www.ncbi.nlm.nih.gov/pubmed/10802332> (accessed 21 Nov 2018).  
17  
18 32 Hajian-Tilaki K. Receiver Operating Characteristic (ROC) Curve Analysis for Medical Diagnostic  
19  
20 Test Evaluation. *Casp J Intern Med* 2013;**4**:627–  
21  
22 35. <http://www.ncbi.nlm.nih.gov/pubmed/24009950> (accessed 21 Nov 2018).  
23  
24 33 Fagard RH, Thijs L, Staessen JA, *et al*. Night–day blood pressure ratio and dipping pattern as  
25  
26 predictors of death and cardiovascular events in hypertension. *J Hum Hypertens*  
27  
28 2009;**23**:645–53. doi:10.1038/jhh.2009.9  
29  
30 34 Tsioufis C, Andrikou I, Thomopoulos C, *et al*. Increased nighttime blood pressure or  
31  
32 nondipping profile for prediction of cardiovascular outcomes. *J Hum Hypertens* 2011;**25**:281–  
33  
34 93. doi:10.1038/jhh.2010.113  
35  
36  
37  
38  
39  
40  
41  
42  
43  
44  
45  
46  
47  
48  
49  
50  
51  
52  
53  
54  
55  
56  
57  
58  
59  
60

## Figure Legends

Figure 1. Participant Timeline



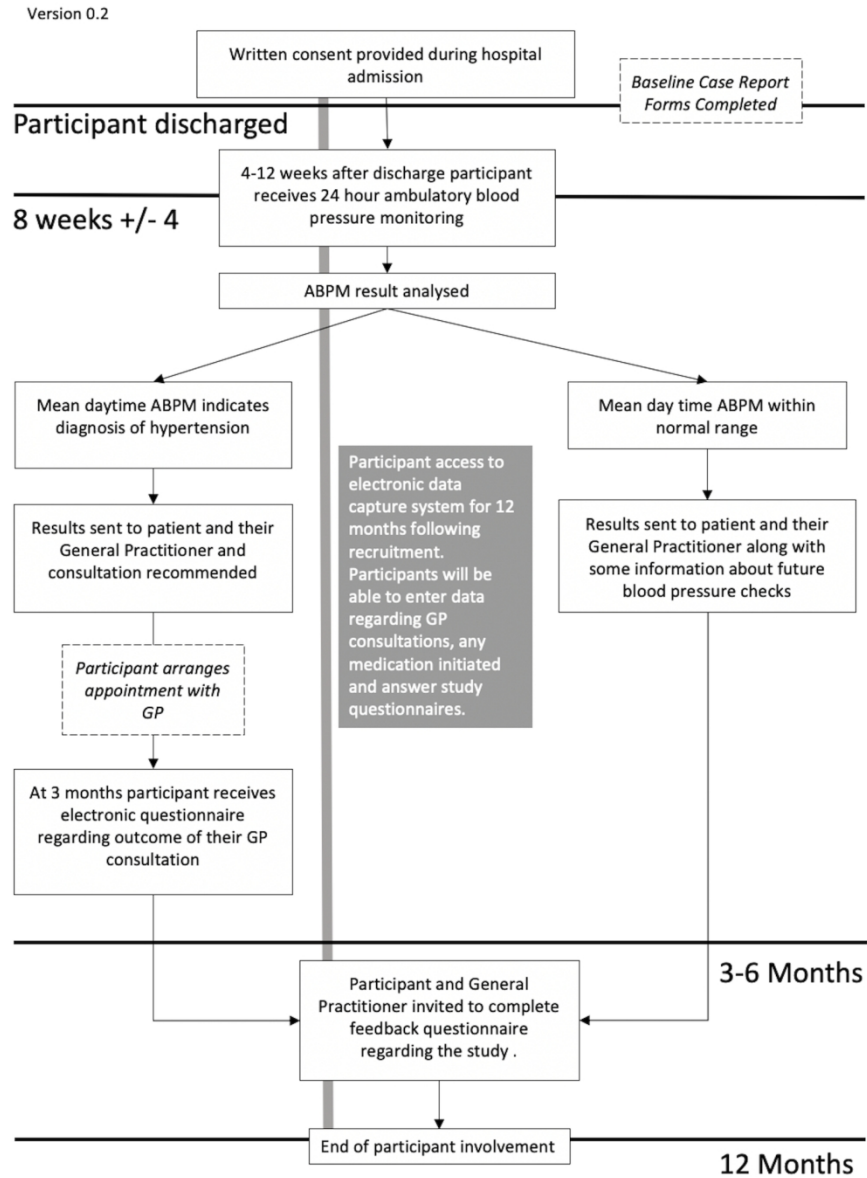

Figure 1. Participant Flow.

140x183mm (300 x 300 DPI)



| Section & Topic          | No  | Item                                                                                                                                                   | Reported on page #                                                                                   |
|--------------------------|-----|--------------------------------------------------------------------------------------------------------------------------------------------------------|------------------------------------------------------------------------------------------------------|
| <b>TITLE OR ABSTRACT</b> |     |                                                                                                                                                        |                                                                                                      |
|                          | 1   | Identification as a study of diagnostic accuracy using at least one measure of accuracy (such as sensitivity, specificity, predictive values, or AUC)  | 1                                                                                                    |
| <b>ABSTRACT</b>          |     |                                                                                                                                                        |                                                                                                      |
|                          | 2   | Structured summary of study design, methods, results, and conclusions (for specific guidance, see STARD for Abstracts)                                 | 2                                                                                                    |
| <b>INTRODUCTION</b>      |     |                                                                                                                                                        |                                                                                                      |
|                          | 3   | Scientific and clinical background, including the intended use and clinical role of the index test                                                     | 4                                                                                                    |
|                          | 4   | Study objectives and hypotheses                                                                                                                        | 4                                                                                                    |
| <b>METHODS</b>           |     |                                                                                                                                                        |                                                                                                      |
| <i>Study design</i>      | 5   | Whether data collection was planned before the index test and reference standard were performed (prospective study) or after (retrospective study)     | 5                                                                                                    |
| <i>Participants</i>      | 6   | Eligibility criteria                                                                                                                                   | 5-6                                                                                                  |
|                          | 7   | On what basis potentially eligible participants were identified (such as symptoms, results from previous tests, inclusion in registry)                 | 6                                                                                                    |
|                          | 8   | Where and when potentially eligible participants were identified (setting, location and dates)                                                         | 5                                                                                                    |
|                          | 9   | Whether participants formed a consecutive, random or convenience series                                                                                | 6                                                                                                    |
| <i>Test methods</i>      | 10a | Index test, in sufficient detail to allow replication                                                                                                  | 7                                                                                                    |
|                          | 10b | Reference standard, in sufficient detail to allow replication                                                                                          | 7-8                                                                                                  |
|                          | 11  | Rationale for choosing the reference standard (if alternatives exist)                                                                                  | 8                                                                                                    |
|                          | 12a | Definition of and rationale for test positivity cut-offs or result categories of the index test, distinguishing pre-specified from exploratory         | 7 and 10                                                                                             |
|                          | 12b | Definition of and rationale for test positivity cut-offs or result categories of the reference standard, distinguishing pre-specified from exploratory | 8 and 10                                                                                             |
|                          | 13a | Whether clinical information and reference standard results were available to the performers/readers of the index test                                 | 6                                                                                                    |
|                          | 13b | Whether clinical information and index test results were available to the assessors of the reference standard                                          | 8                                                                                                    |
| <i>Analysis</i>          | 14  | Methods for estimating or comparing measures of diagnostic accuracy                                                                                    | 9-10                                                                                                 |
|                          | 15  | How indeterminate index test or reference standard results were handled                                                                                | 8                                                                                                    |
|                          | 16  | How missing data on the index test and reference standard were handled                                                                                 | 9-10                                                                                                 |
|                          | 17  | Any analyses of variability in diagnostic accuracy, distinguishing pre-specified from exploratory                                                      | 10                                                                                                   |
|                          | 18  | Intended sample size and how it was determined                                                                                                         | 9                                                                                                    |
| <b>RESULTS</b>           |     |                                                                                                                                                        |                                                                                                      |
| <i>Participants</i>      | 19  | Flow of participants, using a diagram                                                                                                                  | Consort diagram not yet available as study protocol, but participant timeline available in figure 1. |
|                          | 20  | Baseline demographic and clinical characteristics of participants                                                                                      | 9                                                                                                    |
|                          | 21a | Distribution of severity of disease in those with the target condition                                                                                 | 9                                                                                                    |
|                          | 21b | Distribution of alternative diagnoses in those without the target condition                                                                            | n/a                                                                                                  |
|                          | 22  | Time interval and any clinical interventions between index test and reference standard                                                                 | 7                                                                                                    |
| <i>Test results</i>      | 23  | Cross tabulation of the index test results (or their distribution) by the results of the reference standard                                            | 9                                                                                                    |
|                          | 24  | Estimates of diagnostic accuracy and their precision (such as 95% confidence intervals)                                                                | 9                                                                                                    |
|                          | 25  | Any adverse events from performing the index test or the reference standard                                                                            | 11                                                                                                   |
| <b>DISCUSSION</b>        |     |                                                                                                                                                        |                                                                                                      |
|                          | 26  | Study limitations, including sources of potential bias, statistical uncertainty, and generalisability                                                  | n/a                                                                                                  |
|                          | 27  | Implications for practice, including the intended use and clinical role of the index test                                                              | 10                                                                                                   |

| OTHER INFORMATION |    |                                                       |                  |
|-------------------|----|-------------------------------------------------------|------------------|
|                   | 28 | Registration number and name of registry              | n/a: in progress |
|                   | 29 | Where the full study protocol can be accessed         | n/a: in progress |
|                   | 30 | Sources of funding and other support; role of funders | 10               |

For peer review only



# STARD 2015

---

## AIM

STARD stands for “Standards for Reporting Diagnostic accuracy studies”. This list of items was developed to contribute to the completeness and transparency of reporting of diagnostic accuracy studies. Authors can use the list to write informative study reports. Editors and peer-reviewers can use it to evaluate whether the information has been included in manuscripts submitted for publication.

---

## EXPLANATION

A **diagnostic accuracy study** evaluates the ability of one or more medical tests to correctly classify study participants as having a **target condition**. This can be a disease, a disease stage, response or benefit from therapy, or an event or condition in the future. A medical test can be an imaging procedure, a laboratory test, elements from history and physical examination, a combination of these, or any other method for collecting information about the current health status of a patient.

The test whose accuracy is evaluated is called **index test**. A study can evaluate the accuracy of one or more index tests. Evaluating the ability of a medical test to correctly classify patients is typically done by comparing the distribution of the index test results with those of the **reference standard**. The reference standard is the best available method for establishing the presence or absence of the target condition. An accuracy study can rely on one or more reference standards.

If test results are categorized as either positive or negative, the cross tabulation of the index test results against those of the reference standard can be used to estimate the **sensitivity** of the index test (the proportion of participants *with* the target condition who have a positive index test), and its **specificity** (the proportion *without* the target condition who have a negative index test). From this cross tabulation (sometimes referred to as the contingency or “2x2” table), several other accuracy statistics can be estimated, such as the positive and negative **predictive values** of the test. Confidence intervals around estimates of accuracy can then be calculated to quantify the statistical **precision** of the measurements.

If the index test results can take more than two values, categorization of test results as positive or negative requires a **test positivity cut-off**. When multiple such cut-offs can be defined, authors can report a receiver operating characteristic (ROC) curve which graphically represents the combination of sensitivity and specificity for each possible test positivity cut-off. The **area under the ROC curve** informs in a single numerical value about the overall diagnostic accuracy of the index test.

The **intended use** of a medical test can be diagnosis, screening, staging, monitoring, surveillance, prediction or prognosis. The **clinical role** of a test explains its position relative to existing tests in the clinical pathway. A replacement test, for example, replaces an existing test. A triage test is used before an existing test; an add-on test is used after an existing test.

Besides diagnostic accuracy, several other outcomes and statistics may be relevant in the evaluation of medical tests. Medical tests can also be used to classify patients for purposes other than diagnosis, such as staging or prognosis. The STARD list was not explicitly developed for these other outcomes, statistics, and study types, although most STARD items would still apply.

---

## DEVELOPMENT

This STARD list was released in 2015. The 30 items were identified by an international expert group of methodologists, researchers, and editors. The guiding principle in the development of STARD was to select items that, when reported, would help readers to judge the potential for bias in the study, to appraise the applicability of the study findings and the validity of conclusions and recommendations. The list represents an update of the first version, which was published in 2003.

More information can be found on <http://www.equator-network.org/reporting-guidelines/stard>.



Supplement: bmjopen-2019-033792.draft_revisions.pdf [file bmjopen-2019-033792.draft_revisions.pdf]
